# Supplementary material
Source: Springer Nature journal article supplement (https://www.springermedizin.de/resource/supplementary/12889_2012_4526_MOESM2_ESM.pdf/9493422)

Commencement of nPEP communication strategy (March 2005)

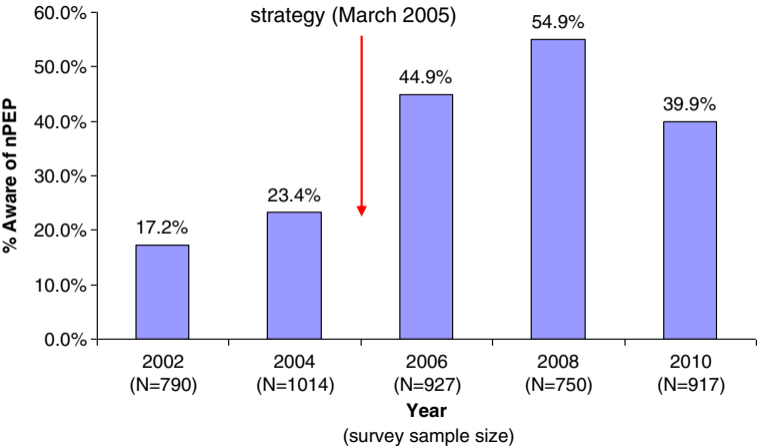

Supplement: MOESM2 [file 9493422]
